# Supplementary material for: Vaccipack, A Mobile App to Promote Human Papillomavirus Vaccine Uptake Among Adolescents Aged 11 to 14 Years: Development and Usability Study
Source: PubMed Central journal article supplement (PMC8279454; doi:10.2196/19503), 2020-10-29
Supplement: nursing_v3i1e19503_app2.pdf [file nursing_v3i1e19503_app2.pdf]

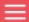

🏠 Home

📖 Stories

🗨️ Forum

✓ Checklist

MORE

▶ Video

👤 Profile

📄 About

🚪 Log Out

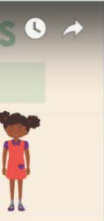

e 6-12...

# vaccipack

Welcome to Vaccipack.

This app is designed to help you keep track of your vaccination history.

LOG IN

NEW ACCOUNT

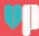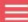

## INTRO VIDEO

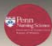

HPV Vaccine

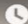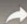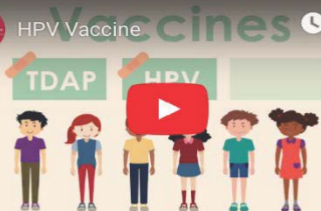

## VACCINES NEEDED

**HPV 2nd dose**For **Ben**

Don't forget to get the the 2nd dose 6-12...

**HPV 1st dose**For **Alex**

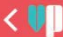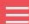

CREATE A NEW POST

This is a forum for users to start a discussion, exchange tips and ask questions. An expert may weigh in.

All ▼

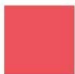

## Waiting until marriage

Tags: Increased sexual activity , Age of vaccination , How common is HPV? , Family history of HPV , Do boys need it?

17 Sep

 0

Can my child get infected with HPV if they wait until they get married to have sex? [READ MORE](#) →
